# Supplementary material for: A New Perspective for Vineyard Terroir Identity: Looking for Microbial Indicator Species by Long Read Nanopore Sequencing
Source: MDPI journal article supplement (doi:10.3390/microorganisms11030672), 2023-03-06
Supplement: s1 [file s1]

# A new perspective for vineyard terroirs identity: looking for microbial indicator species by Long Read Nanopore Sequencing

Ana Cruz-Silva <sup>1,2</sup>, Gonalo Laureano <sup>1,2</sup>, Marcelo Pereira <sup>1</sup>, Ricardo Dias <sup>1,3</sup>, Jos  Moreira da Silva <sup>4</sup>, Nuno Oliveira <sup>5</sup>, Catarina Gouveia <sup>1,2</sup>, Cristina Cruz <sup>3,6</sup>, Margarida Gama-Carvalho <sup>1,7</sup>, Fiammetta Alagna <sup>8</sup>, Bernardo Duarte <sup>3,9</sup> and Andreia Figueiredo <sup>1,2,3,\*</sup>

- <sup>1</sup> Biosystems & Integrative Sciences Institute (BioISI), Faculdade de Ci ncias da Universidade de Lisboa, Lisboa, Portugal. amcsilva@fc.ul.pt (A.C.-S.); gmlaureano@fc.ul.pt (G.L.); mlpereira@fc.ul.pt (M.P.); rpdias@fc.ul.pt (R.D.); cagouveia@fc.ul.pt (C.G.); mhcarvalho@fc.ul.pt (M.G.-C.)
- <sup>2</sup> Grapevine Pathogen Systems Lab, BioISI Faculdade de Ci ncias da Universidade de Lisboa, Lisboa, Portugal.
- <sup>3</sup> Departamento de Biologia Vegetal, Faculdade de Ci ncias da Universidade de Lisboa, Campo Grande, 1749-016, Lisboa, Portugal. ccruz@fc.ul.pt (C.C.); baduarte@fc.ul.pt (B.D.)
- <sup>4</sup> Quinta dos Muras, Espor o Company, Douro, Portugal. jose.luis@esporao.com (J.M.S)
- <sup>5</sup> NBI – Natural Business Intelligence, Regia Douro Park, 5000-033 Vila Real, Portugal. nuno.oliveira@nbi.pt (N.O.)
- <sup>6</sup> cE3c - Center for Ecology, Evolution and Environmental Changes & CHANGE - Global Change and Sustainability Institute, Faculdade de Ci ncias da Universidade de Lisboa, Campo Grande, 1749-016, Lisboa, Portugal.
- <sup>7</sup> Departamento de Qu mica e Bioqu mica, Faculdade de Ci ncias da Universidade de Lisboa, Campo Grande, 1749-016, Lisboa, Portugal.
- <sup>8</sup> Energy Technologies and Renewable Sources Department, National Agency for New Technologies, Energy and Sustainable Economic Development (ENEA), Trisaia Research Centre, Rotondella, Matera, Italy. fiammetta.alagna@enea.it (F.A.)
- <sup>9</sup> MARE – Marine and Environmental Sciences Centre & ARNET – Aquatic Research Infrastructure Network Associate Laboratory, Faculty of Sciences of the University of Lisbon, Campo Grande 1749-016 Lisbon, Portugal.
- \* Correspondence: aafigueiredo@fc.ul.pt

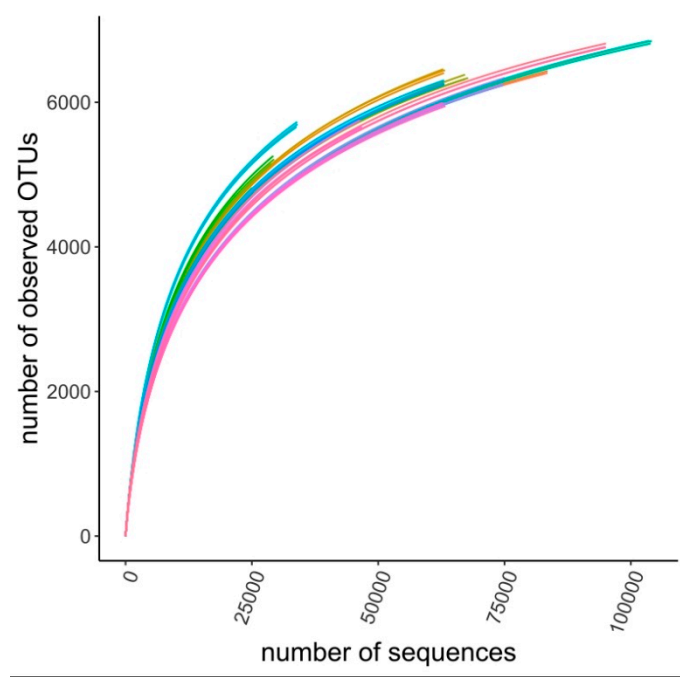

**Figure S1:** Rarefaction curve showing number of observed taxa in each terroir sample.



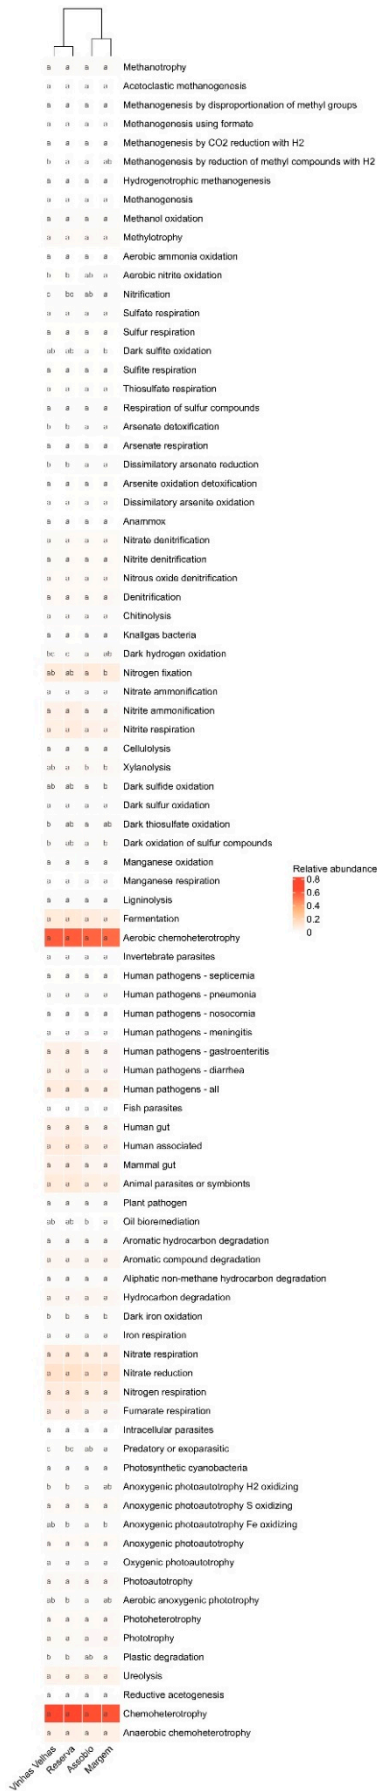

**Figure S3:** Terroir associated Prokaryotes function predicted by FAPROTAX database. Relative Abundance (0-1) hierarchical clustering based on squared Euclidean distance and complete linkage method.

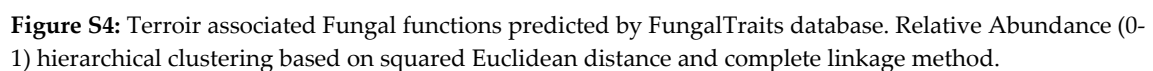

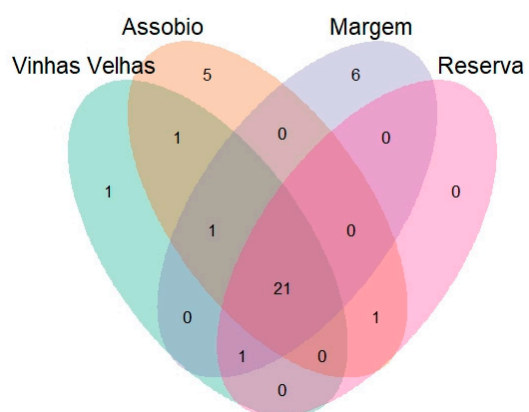

**Figure S5:** Venn diagram representing the terroir where the 37 identified potential indicator species can be found.

**Table S3:** Number different taxonomic level present in each Terroir.

|               | Number of different taxonomic levels |       |       |        |       |         |
|---------------|--------------------------------------|-------|-------|--------|-------|---------|
|               | Phylum                               | Class | Order | Family | Genus | Species |
| Assobio       | 57                                   | 135   | 331   | 798    | 2 355 | 7 300   |
| Margem        | 60                                   | 138   | 335   | 798    | 2 366 | 7 301   |
| Reserva       | 58                                   | 134   | 330   | 789    | 2 325 | 7 131   |
| Vinhas Velhas | 61                                   | 141   | 339   | 798    | 2 343 | 7 238   |
| Total         | 67                                   | 149   | 351   | 841    | 2 633 | 8 558   |

**Table S4:** Abundance of detected pathogens in Quinta dos Murças terroirs soils.

|                                    | Vinhas Velhas                                 | Assobio                                       | Margem                                        | Reserva                                       |
|------------------------------------|-----------------------------------------------|-----------------------------------------------|-----------------------------------------------|-----------------------------------------------|
| <i>Plasmopara viticola</i>         | $4.44 \times 10^{-5} \pm 4.21 \times 10^{-5}$ | $2.22 \times 10^{-5} \pm 2.90 \times 10^{-5}$ | $5.77 \times 10^{-5} \pm 5.32 \times 10^{-5}$ | $4.44 \times 10^{-5} \pm 4.44 \times 10^{-5}$ |
| <i>Botrytis cinerea</i>            | 0                                             | $2.22 \times 10^{-5} \pm 4.05 \times 10^{-5}$ | 0                                             | $2.22 \times 10^{-5} \pm 2.22 \times 10^{-5}$ |
| <i>Erysiphe necator</i>            | $1.33 \times 10^{-5} \pm 2.00 \times 10^{-5}$ | 0                                             | 0                                             | 0                                             |
| <i>Phaeomoniella chlamydospora</i> | $1.33 \times 10^{-5} \pm 2.82 \times 10^{-5}$ | $3.99 \times 10^{-5} \pm 3.46 \times 10^{-5}$ | $4.88 \times 10^{-5} \pm 5.91 \times 10^{-5}$ | $3.10 \times 10^{-5} \pm 3.10 \times 10^{-5}$ |
| <i>Phaeoacremonium minimum</i>     | $5.77 \times 10^{-5} \pm 4.05 \times 10^{-5}$ | $8.43 \times 10^{-5} \pm 5.80 \times 10^{-5}$ | $5.59 \times 10^{-4} \pm 6.39 \times 10^{-4}$ | $4.44 \times 10^{-5} \pm 4.44 \times 10^{-5}$ |
| <i>Eutypa lata</i>                 | $1.15 \times 10^{-4} \pm 7.32 \times 10^{-5}$ | $6.65 \times 10^{-5} \pm 6.91 \times 10^{-5}$ | $1.38 \times 10^{-4} \pm 1.18 \times 10^{-4}$ | $1.02 \times 10^{-4} \pm 1.02 \times 10^{-4}$ |
| <i>Lasiodiplodia theobromae</i>    | $7.54 \times 10^{-5} \pm 4.66 \times 10^{-5}$ | $7.98 \times 10^{-5} \pm 6.62 \times 10^{-5}$ | $1.29 \times 10^{-4} \pm 2.66 \times 10^{-5}$ | $3.99 \times 10^{-5} \pm 3.99 \times 10^{-5}$ |
| <i>Neofusicoccum parvum</i>        | $3.55 \times 10^{-5} \pm 3.70 \times 10^{-5}$ | $6.21 \times 10^{-5} \pm 4.51 \times 10^{-5}$ | $9.31 \times 10^{-5} \pm 4.89 \times 10^{-5}$ | $4.44 \times 10^{-5} \pm 4.44 \times 10^{-5}$ |
| <i>Botryosphaeria dothidea</i>     | 0                                             | 0                                             | $8.87 \times 10^{-6} \pm 1.76 \times 10^{-5}$ | 0                                             |
| <i>Fomitiporia mediterranea</i>    | $3.1 \times 10^{-5} \pm 4.36 \times 10^{-5}$  | $1.77 \times 10^{-5} \pm 4.05 \times 10^{-5}$ | $2.22 \times 10^{-5} \pm 4.51 \times 10^{-5}$ | $1.77 \times 10^{-5} \pm 1.77 \times 10^{-5}$ |
